# Supplementary material
Source: PubMed Central journal article supplement (PMC4047973)
Supplement: NIHMS569804-supplement-Supplemental_Table.pdf [file NIHMS569804-supplement-Supplemental_Table.pdf]

**Supplemental Table 1.** Proteins associated with the human ESCRT pathway

| Human protein name <sup>1</sup> | Other names <sup>1</sup>                                                                                                   | Yeast homolog <sup>2</sup>        |
|---------------------------------|----------------------------------------------------------------------------------------------------------------------------|-----------------------------------|
| <b>Bro1 Proteins</b>            |                                                                                                                            |                                   |
| ALIX                            | PDCD61P, AIP1, HP95                                                                                                        | Bro1p, Vps31p, Npi3p <sup>3</sup> |
| HD-PTP                          | PTPN23, PTP-TD14                                                                                                           | Bro1p                             |
| BROX                            |                                                                                                                            | -                                 |
| RHPN1                           | Rhophilin-1                                                                                                                | -                                 |
| RHPN2                           | Rhophilin-2, p76RBE                                                                                                        | -                                 |
| <b>ESCRT-I</b>                  |                                                                                                                            |                                   |
| TSG101                          | hVps23                                                                                                                     | Stp22p, Vps23p                    |
| VPS28                           |                                                                                                                            | Vps28p                            |
| VPS37 (A, B, C, D)              | A = HCRP1                                                                                                                  | Srn2p, Vps37p,                    |
| MVB12 (A, B, UBAP1)             | A = CIN85/CD2AP family-binding protein, B = Protein FAM125B<br>UBAP1 = Nasopharyngeal carcinoma-associated gene 20 protein | Mvb12p                            |
| <b>ESCRT-II</b>                 |                                                                                                                            |                                   |
| EAP20                           | hVps25, Dermal papilla-derived protein 9, VPS25                                                                            | Vps25p                            |
| EAP30                           | SNF8, hVps22                                                                                                               | Snf8p, Vps22p                     |
| EAP45                           | hVps36                                                                                                                     | Vps36p, Vac3p                     |
| <b>ESCRT-III</b>                |                                                                                                                            |                                   |
| CHMP1 (A, B)                    | A = hVps46-1, B = CHMP1.5, hVps46-2                                                                                        | Did2p, Vps46p, Chm1p              |
| CHMP2 (A, B)                    | A = hVps2-1, Putative breast adenocarcinoma marker BC-2;<br>B = CHMP2.5, hVps2-2                                           | Did4p, Vps2p, Chm2p,              |
| CHMP3                           | hVps24, NEDF                                                                                                               | Vps24p, Did3p                     |
| CHMP4 (A, B, C)                 | SNF7 homolog associated with Alix-(2,1,3)<br>SNF7-(1,2,3) hVps32-(1,2,3)                                                   | Snf7p, Vps32p, Did1p              |
| CHMP5                           | SNF7 domain-containing protein 2, hVps60                                                                                   | Vps60p, Chm5p                     |
| CHMP6                           | hVps20                                                                                                                     | Vps20p, Chm6p                     |
| CHMP7                           |                                                                                                                            | -                                 |
| IST1                            | PM28                                                                                                                       | Ist1p                             |
| <b>VPS4 complex</b>             |                                                                                                                            |                                   |
| VPS4 (A, B)                     | A = SKD1A, SKD2; B = SKD1B                                                                                                 | Vps4p                             |
| LIP5                            | VTA1 homolog, DRG-1, SBP1                                                                                                  | Vta1p                             |
| <b>Adaptors</b>                 |                                                                                                                            |                                   |
| HRS                             | HGS, Protein pp110                                                                                                         | Vps27p                            |
| STAM                            | STAM1                                                                                                                      | Hse1p                             |
| STAM-2                          | HBP                                                                                                                        | Hse1p                             |
| Syntenin-1                      | Syndecan-binding protein1, MDA-9, TACIP18, Scaffold protein Pbp1,                                                          | -                                 |

|                                         |                                                                                                     |                                         |
|-----------------------------------------|-----------------------------------------------------------------------------------------------------|-----------------------------------------|
| <b>Syntenin-2</b>                       | Syndecan-binding protein 2                                                                          | -                                       |
| <b>ARRDC1</b>                           |                                                                                                     | Art1-9 <sup>4</sup>                     |
| <b>Gag</b>                              | Pr55Gag                                                                                             | -                                       |
| <b>CEP55</b>                            | Up-regulated in colon cancer 6                                                                      | -                                       |
|                                         |                                                                                                     |                                         |
| <b>Ubiquitin ligases</b> (partial list) |                                                                                                     |                                         |
| <b>NEDD4</b>                            | Cell proliferation-inducing gene 53 protein                                                         | <b>Rsp5p</b> (sole NEDD4 family member) |
| <b>NEDD4L</b>                           | NEDD4.2                                                                                             | -                                       |
| <b>WWP1</b>                             | AIP5, Tiul1                                                                                         | -                                       |
| <b>WWP2</b>                             | AIP2                                                                                                | -                                       |
|                                         |                                                                                                     |                                         |
| <b>Ubiquitin hydrolases</b>             |                                                                                                     |                                         |
| <b>UBPY</b>                             | Ubiquitin carboxyl-terminal hydrolase 8, USP8, Deubiquitinating enzyme 8, Ubiquitin thioesterase 8, | <sup>5</sup>                            |
| <b>AMSH</b>                             | STAMPB                                                                                              | -                                       |

1. UniProtKB/Swiss-Prot Recommended Names are in red. Other common names are in black
2. *Saccharomyces* Genome Database (SGD) Preferred Names are in red. Other common names are in black
3. Rim20p is also a Bro1 family member in yeast, but without a clear mammalian homolog
4. Nine yeast arrestin domain-containing proteins are described in Reference 187
5. Doa4p is a ubiquitin hydrolase in yeast, but without a clear mammalian homolog
